## Minireview

# Amino Acid Transport Regulates Blastocyst Implantation<sup>1</sup>

Patrick M. Martin,<sup>3</sup> Ann E. Sutherland,<sup>2,3</sup> and Lon J. Van Winkle<sup>4</sup>

Department of Cell Biology,<sup>3</sup> University of Virginia, Charlottesville, Virginia

Department of Biochemistry,<sup>4</sup> Midwestern University, Downers Grove, Illinois

### ABSTRACT

Mouse blastocyst outgrowth *in vitro* and probably implantation *in vivo* require amino acid signaling via the target of rapamycin (TOR) pathway. This signaling does not simply support protein synthesis and trophoblast differentiation. Rather, it regulates development of trophoblast protrusive activity and may act as a developmental checkpoint for implantation. Moreover, intracellular amino acids *per se* are insufficient to elicit TOR signaling. Instead, *de novo* transport of amino acids, and particularly of leucine, stimulate mTOR activity at the blastocyst stage. The activity of the broad-scope and yet leucine-selective amino acid transport system B<sup>0,+</sup> could produce such increases in intracellular amino acid concentrations. For example, system B<sup>0,+</sup> uses a Na<sup>+</sup> gradient to drive amino acid uptake, and the Na<sup>+</sup> concentration in uterine secretions increases by nearly two-fold about 18 h before implantation. The resultant mTOR signaling could trigger polyamine, insulin-like growth factor II, and nitric oxide production in blastocysts and the increased cell motility sometimes associated with synthesis of these bioactive molecules.

*embryo, implantation, nitric oxide, placenta, trophoblast*

### INTRODUCTION

At the time of implantation, the mammalian embryo has the form of a hollow sphere, the blastocyst, with a squamous cell layer at the periphery and a mass of cells inside the periphery at one end. The enclosed cells are the inner cell mass (ICM) and the squamous cells constitute the trophoblast (TE). These two cell populations are the founder populations for embryo and placenta; the ICM gives rise to the embryo proper, and the TE forms placental tissues. In many mammalian species, including mice and humans, the TE initiates invasion by the embryo into the uterus, which anchors the embryo and eventually provides its links to the maternal circulation. Initiation of this implantation process is interesting from two additional per-

spectives; it involves regulated changes in cell behavior also seen in other embryonic events and it resembles, in many ways, the process by which cancer cells become metastatic.

Mammalian implantation is regulated by factors both intrinsic and extrinsic to the embryo. Intrinsic changes in gene expression regulate the lineage commitment of the TE cell population and direct their subsequent differentiation, while extrinsic signals from the uterus modulate the timing and rate of TE differentiation to coordinate the progress of implantation between embryo and uterus. The mechanisms, both intrinsic and extrinsic, that underlie the transition of epithelial TE cells to invasive trophoblast are thus the key regulators of the embryo's ability to implant. In this review, we discuss these differentiation events and focus particularly on the extrinsic regulatory functions of exogenous amino acids.

### *Trophoblast Protrusive Activity and Blastocyst Implantation*

To penetrate the uterine epithelium, the TE cells must change their form from that of a squamous epithelium to a more motile, mesenchymal cell type. *In vivo*, the switch from epithelial to motile cells is manifested at E4.5 by the formation of trophoblast cell protrusions that penetrate between the uterine epithelial cells to surround and engulf those that have undergone apoptosis. A similar change in behavior can be induced *in vitro* by placing blastocysts on substrates of extracellular matrix (ECM), where the TE cells will attach and spread in a monolayer surrounding the ICM. When preimplantation mouse embryos are cultured *in vitro* after induction of ovulation using hCG, trophoblast cells acquire the ability to form outgrowths between the early blastocyst (120-h post-hCG) and late blastocyst (168-h post-hCG) stages.

This switch is characterized by changes in TE cell motility, apical membrane composition, and cell-cell adhesion [1, 2]. Changes in TE apical membrane composition and in cell-cell adhesion allow the blastocyst to attach to the apical surface of the uterine epithelium, while changes in motility permit protrusion formation for invasion. When analyzed *in vitro*, changes in apical membrane composition are observed as the progressive ability of fibronectin to stimulate adhesion of the TE to the ECM as blastocyst development proceeds [3–5]. At 120 h post-hCG, fibronectin has no effect on TE adhesivity, while at 168 h post-hCG, it stimulates strong ECM adhesivity. TE cell motility is concomitantly regulated, as observed by time-lapse video record-

<sup>1</sup>Supported by grant RO1 HD034807 to A.E.S. and by an NIH GRA supplement to P.M.M. P.M.M. was supported by the Biotechnology Training Grant (T32-GM08715).

<sup>2</sup>Correspondence: Ann E. Sutherland, Department of Cell Biology, University of Virginia Health System, P.O. Box 800732, Charlottesville, VA 22901. e-mail: as9n@virginia.edu

Received: 9 April 2003.

First decision: 5 May 2003.

Accepted: 28 May 2003.

© 2003 by the Society for the Study of Reproduction, Inc.

ISSN: 0006-3363. <http://www.biolreprod.org>

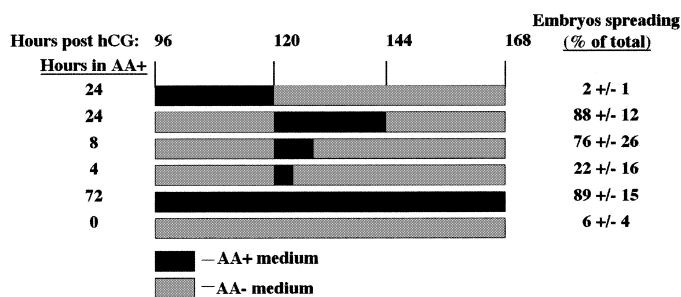

FIG. 1. Time requirement for amino acid-induced mouse trophoblast spreading. Embryos were exposed at the indicated times post-hCG to amino acid-containing medium (AA+), then rinsed and further cultured in medium lacking amino acids (AA-) after the indicated number of hours.

ings of blastocysts between 120 and 168 h post-hCG [2, 6]. At 120 h, the TE cells are nonmotile, but by 144 h, the quiescent TE cells exhibit a low rate of protrusive activity that increases in frequency to 168 h post-hCG and results in outgrowth if the blastocysts are cultured on an appropriate substrate. Changes in cell-cell adhesion become evident late, with collapse of the blastocoele cavity and retraction of TE cells to the ICM pole of the blastocyst [2, 7]. From these observations, it appears that changes in motility and apical membrane composition are coordinately regulated and required for outgrowth, while changes in cell-cell adhesion may either occur later than, or result from, changes in apical membrane composition and motility.

The changes in TE cell apical membrane composition, motility, and cell-cell adhesion are observed *in vivo* as well as *in vitro* and are crucial for the success of implantation and placentation. Changes in apical membrane composition are evident in the attachment of TE cells through their apical domains to the apices of the uterine epithelial cells. In addition, integrin receptors are relocalized from basal to apical domains as the TE cells extend protrusions [8]. These changes permit both initial attachment to the epithelium and subsequent adhesion to the underlying ECM during invasion. The onset of TE cell motility results in protrusion formation, trophoblast cell spreading on the uterine epithelial basement membrane, and engulfment of apoptotic uterine epithelial and decidual cells [9–11].

The motility changes that facilitate penetration of the blastocyst through the uterine epithelium are also critical for subsequent remodeling of the implantation chamber. The trophoblast cells that form the yolk sac placenta are highly phagocytic, and by engulfing apoptotic decidual cells, they increase the volume of the implantation chamber, allowing for growth of the embryo. Without this phagocytic activity, embryonic growth is restricted and morphogenesis is abnormal (Aeder and Sutherland, unpublished data).

Several observations have documented changes in trophoblast cell-cell adhesion during implantation *in vivo*. There are changes in expression of tight and adherens junction proteins, and the appearance of gaps in the layer of trophoblast cells that remain in contact with the underlying basement membrane (Reichert membrane) [10–13]. The increased permeability of the trophoblast cell layer allows diffusion of oxygen and nutrients to the embryo.

#### *Development of Trophoblast Protrusive Activity Requires Amino Acid-Dependent Mammalian Target of Rapamycin Signaling in Early Blastocysts*

Blastocyst outgrowth is profoundly affected by environmental factors and, in particular, by the availability of ex-

ogenously provided amino acids [2, 14–16]. For example, in the absence of leucine or arginine, embryos remain as expanded blastocysts and do not form outgrowths in culture [14, 15, 17]. Further studies have shown that amino acid availability specifically regulates development of protrusive activity in trophoblast cells, thus also regulating initiation of motility and the spreading behavior required for implantation [2, 16]. When embryos are cultured in medium that lacks amino acids, the TE cells undergo normal changes in adhesivity and begin to express placental lactogen I, as they would in amino acid-containing medium [2]. In contrast, they neither develop protrusive activity nor do they undergo the normal changes in cell-cell adhesion in the absence of added amino acids [2, 14, 17]. Thus, amino acid deprivation does not have a general effect on trophoblast differentiation but specifically prevents the onset of implantation behavior by limiting trophoblast motility.

Amino acids regulate intracellular signaling pathways that have been described in widely different organisms from yeast to mammals [reviewed in 18]. Amino acid signaling activates a serine-threonine kinase, mammalian target of rapamycin (mTOR), which in turn phosphorylates at least two proteins involved in regulation of translation initiation, p70S6K and PHAS-I [18, 19]. These signaling pathways regulate the balance between protein synthesis and catabolism [20] and they modulate the transduction of insulin and insulin-like growth factor signals [19].

The initiation of trophoblast cell motility also depends on amino acid signaling through mTOR [2]. Treatment with rapamycin, a specific inhibitor of mTOR, inhibits initiation of trophoblast motility and spreading behavior. Rapamycin also blocks amino acid-initiated trophoblast motility and spreading behavior, while competitive inhibition of rapamycin with FK506 restores the amino acid stimulation. Under conditions of amino acid deprivation or rapamycin treatment, p70S6K remains unphosphorylated, confirming that mTOR activation is inhibited in both cases [2]. These results demonstrate that amino acid-dependent mTOR signaling leads to development of trophoblast cell motility and initiation of implantation.

#### *Amino Acid Transport Regulates mTOR Signaling During a 4- to 8-h Period in Early Blastocysts*

Amino acids activate a program of trophoblast differentiation at a very precise time during development [2]. In embryos developing *in vitro*, amino acid-stimulated mTOR signaling can occur only after the early blastocyst stage (i.e., 120 h post-hCG). Prior to 120 h post-hCG, exposure to amino acids will not promote later outgrowth, while after 120 h post-hCG, the blastocyst will not progress to an implantation-competent state without contact with exogenously provided amino acids (Fig. 1) [2, 16]. Contact with amino acids is required for only a 4- to 8-h period at 120 h post-hCG, after which exogenously supplied amino acids are not needed for development of trophoblast motility (Fig. 1).

The timing and short duration of the amino acid requirement are consistent with the hypothesis that it acts as a developmental checkpoint. That is, it may be a mechanism by which the embryo and uterus coordinate trophoblast differentiation with development of a uterine epithelium that is receptive to implantation. In this regard, the time at which the TE becomes responsive to exogenously supplied amino acids is also an intrinsic property of TE cells and does not depend on previous conditions. For example, both

TABLE 1. Blastocysts developing in vitro contain low levels of leucine and isoleucine relative to blastocyst developing in vivo (mean  $\pm$  SEM pmol/embryo).<sup>a</sup>

| Amino acid | Blastocysts developing |                     |                       |
|------------|------------------------|---------------------|-----------------------|
|            | In vivo                |                     | In vitro <sup>b</sup> |
|            | 95 h post hCG          | 119 h post hCG      | 119 h post hCG        |
| Threonine  | 0.061 $\pm$ 0.018 A    | 0.453 $\pm$ 0.125 B | 0.282 $\pm$ 0.062 B   |
| Valine     | 0.175 $\pm$ 0.033 A    | 0.081 $\pm$ 0.040 B | 0.086 $\pm$ 0.022 B   |
| Isoleucine | 0.037 $\pm$ 0.012 A    | 0.112 $\pm$ 0.040 A | 0.006 $\pm$ 0.006 B   |
| Leucine    | 0.126 $\pm$ 0.014 A    | 0.092 $\pm$ 0.013 A | 0.055 $\pm$ 0.014 B   |
| Histidine  | 0.176 $\pm$ 0.057 A    | 0.288 $\pm$ 0.073 A | 0.292 $\pm$ 0.073 A   |

<sup>a</sup> Amino acid levels were determined as described previously [24]. Numerically adjacent values with different letters are significantly different ( $P < 0.05$ ) for a particular amino acid (Kruskal-Wallis  $H$ -test, analysis of variance, or nonoverlap of 95% confidence intervals [24]).

<sup>b</sup> Blastocysts developed from two-cell embryos in medium not containing added amino acids [24].

embryos cultured in vitro from the two-cell stage and those flushed from the uterus at the morula stage respond only when exposed to amino acids at or after the early blastocyst stage [2, 16]. Hence, some property acquired at the early blastocyst stage appears to be responsible for development of the capacity to respond to amino acids. Amino acid-dependent signaling then leads to further progress toward differentiation of trophoblast cell motility.

Leucine is especially important for mTOR signaling and has been shown to activate mTOR both in vitro and in vivo [20–23]. Interestingly, blastocysts developing in vitro in the absence of added amino acids are poised to take up both leucine and isoleucine. The leucine and isoleucine levels in blastocysts developing in vitro at 119 h post-hCG are below the levels in blastocysts developing in vivo (Table 1), while the levels of other essential (Table 1) and nonessential [24] amino acids are not. Hence, transfer of blastocysts developing in vitro to medium containing essential and nonessential amino acids for 4–8 h likely leads to accumulation particularly of leucine and isoleucine. In addition, human embryos developing to the blastocyst stage in the presence of amino acids in vitro consistently accumulate leucine but not most other amino acids from the medium [25].

For blastocysts developing in vivo, an increase in amino acid transport system activity, rather than an increase in exogenous amino acid concentrations, likely raises intracellular amino acid levels to trigger mTOR signaling. Exogenous amino acids appear to be abundant in uterine secretions and their presence does not appear to be altered by development of conditions supporting implantation [e.g., 26]. Several known mechanisms could, however, stimulate leucine transport into blastocysts approaching implantation in vivo as discussed below.

#### Amino Acid Transport Regulation in Blastocysts In Vivo

**Development of amino acid transport system expression.** Cells take up and release amino acids through plasma membrane transport systems composed of proteins. Most amino acid transport systems appear to contain a single protein, although some systems are known to be heterodimers [27]. Those proteins catalyzing amino acid migration across biomembranes are termed transporters, while other subunits, if present, are called accessory proteins. Transport systems were categorized previously according to their preferences for cationic, anionic, or zwitterionic amino acids and whether they are Na<sup>+</sup>-dependent [28]. Discovery of families and superfamilies of amino acid transporters that

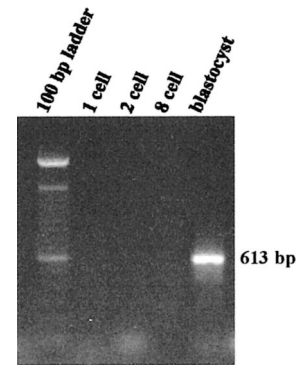

FIG. 2. Expression of mRNA encoding the ATB<sup>0+</sup> protein (system B<sup>0+</sup>) for leucine biomembrane transport in mouse blastocysts. Polymerase chain reaction (PCR) was used to amplify a cDNA segment of the indicated size in libraries produced from oocyte, two- and eight-cell embryo, and blastocyst mRNA [105]. Procedures used for PCR are described more completely elsewhere [106].

do not fit well into one or another of these six categories of amino acid transport systems has led to their classification instead according to phylogenetic relationships.

Mouse blastocysts likely express at least 14 amino acid transporters and two accessory proteins in seven different protein superfamilies. These transporters and accessory proteins comprise a minimum of 14 transport systems in blastocysts [29, 30]. A large proportion (probably most) of these proteins are expressed in human blastocysts as well [29]. Moreover, the activities of at least half of these systems increase greatly upon blastocyst formation sometimes from undetectable levels [31]. Most notably for the present discussion, expression of the leucine-selective system B<sup>0+</sup> becomes conspicuous when preimplantation embryos form blastocysts [30]. This is likely due to changes in transcription of the gene rather than changes in translation or in the activity of preexisting protein, as the mRNA transcript can only be detected at the blastocyst stage (Fig. 2). System B<sup>0+</sup> regulation in vivo could control uptake of leucine and other amino acids needed for mTOR signaling [2] and for embryo growth [32] prior to implantation. Since system B<sup>0+</sup> activity appears to be controlled by regulated changes in the uterine environment, the resultant mTOR signaling and embryo growth also may be properly timed to promote implantation in a receptive uterus.

**System B<sup>0+</sup> regulation in vivo: Possible triggers of mTOR signaling.** Experimental delay of blastocyst implantation in vivo by ovariectomy of female mice has led to discovery of at least two possible mechanisms by which amino acid transport system B<sup>0+</sup> could be regulated to coordinate implantation. In progesterone-maintained ovariectomized mice, estrogen administration leads to blastocyst activation and implantation about 24 h later [33–36]. Within the first 6 h after estrogen treatment, the Na<sup>+</sup> concentration nearly doubles in uterine secretions [37, 38]. Such an increase in the Na<sup>+</sup> level would stimulate Na<sup>+</sup>-dependent leucine uptake via system B<sup>0+</sup> in blastocysts and consequently should raise the intracellular leucine concentration. If TE cells are able to maintain the resultant higher Na<sup>+</sup> total chemical potential gradient across their apical membranes, then their intracellular leucine levels should rise about threefold [31] because the stoichiometry of transport is likely two Na<sup>+</sup> with one leucine molecule [39]. In this regard, only about a 7% increase in the intracellular leucine level is needed to trigger mTOR signaling [40]. Moreover, blastocysts from progesterone-maintained ovariectomized mice remain via-



ble but make no progress toward development of trophoblast protrusive activity in low  $\text{Na}^+$  medium otherwise designed to support trophoblast outgrowth in vitro [41]. The same blastocysts then develop normally when the  $\text{Na}^+$  concentration in the medium is raised.

A second possible mechanism of system  $\text{B}^{0,+}$  stimulation involves a transient fourfold increase in chymotrypsin-like enzyme activity in uterine secretions between 6 and 18 h after estrogen administration to progesterone-maintained ovariectomized mice [42]. Significantly, chymotrypsin stimulates system  $\text{B}^{0,+}$  activity by about twofold in blastocysts from such mice [30, 43] and it hastens the onset of outgrowth in vitro [44]. In vivo, system  $\text{B}^{0,+}$  activity in blastocysts increases dramatically beginning about 6 h after chymotrypsin-like enzyme activity begins to rise in uterine secretions [45]. However, this increased system  $\text{B}^{0,+}$  activity appears to remain largely latent because of other factors in utero [45]. Hence, regulation of amino acid transport in blastocysts in vivo is likely more complex than that simulated, so far, in vitro.

We favor the hypothesis that an increase in the  $\text{Na}^+$  concentration in uterine secretions shortly after estrogen administration to progesterone-maintained ovariectomized mice stimulates system  $\text{B}^{0,+}$  to concentrate leucine in blastocysts. The increased intracellular leucine concentration would trigger mTOR signaling, which would lead to development of trophoblast protrusive activity about 20 h later in vivo. In our view, regulation of system  $\text{B}^{0,+}$  by chymotrypsin-like enzyme activity and uterine factors 6 to 24 h after estrogen injection likely serves other functions perhaps related to coordination of the implantation process itself and protection of the conceptuses from immunologic rejection [30]. Other processes likely supported by increased amino acid uptake by blastocysts in vivo include accumulation of about 50% more protein during the 10 h preceding implantation [32] and production of arginine metabolites needed for implantation.

*Why do blastocysts express so many amino acid transporters selective for arginine transport?* Mouse and human blastocysts likely express at least five transporters selective for arginine transport under physiological conditions [29, 30]. Transport activities likely corresponding to three of these transporters have been detected in mouse blastocysts as systems  $\text{b}^{+}_2$  (CAT1 and CAT2) [30] and system  $\text{b}^{0,+}$  ( $\text{b}^{0,+}\text{AT}$ ) [29]. Because blastocysts express mRNA sequences encoding both CAT1 and CAT2 [30], system  $\text{b}^{+}_2$  may actually represent two transport activities, here provisionally designated  $\text{b}^{+}_{2a}$  and  $\text{b}^{+}_{2b}$ . We also detected sequences encoding two other arginine transporters in human and mouse blastocyst cDNA libraries [29 and unpublished data]. Transport activities corresponding to these transporters have, however, not as yet been delineated in blastocysts, possibly because they are expressed in the basal TE membrane (e.g.,  $\gamma$  + LAT2) [46] or inner cell mass (e.g., ATA3) [47]. System  $\text{B}^{0,+}$  ( $\text{ATB}^{0,+}$ , Fig. 2) also transports arginine but with a  $K_m$  value too high to allow arginine to compete much with leucine for transport via system  $\text{B}^{0,+}$  at physiological amino acid concentrations [48]. Nevertheless, system  $\text{B}^{0,+}$ -catalyzed leucine accumulation probably drives arginine uptake because of the exchange of intracellular leucine for arginine via system  $\text{b}^{0,+}$  in blastocysts [30]. We propose that blastocysts need the conditionally essential amino acid, arginine, not only for net accumulation of protein but also for production of at least six other metabolites, each of which may be required for implantation.

First, preimplantation embryos need the arginine metab-

olite, creatine, and they express creatine kinase [49, 50], which may help to maintain relatively high ATP levels in metabolically active blastocysts. Blastocysts probably express a creatine transporter because a sequence corresponding to such a transporter [51] was found among cDNAs from a mouse blastocyst cDNA library (Accession #CA551108). Blastocysts grow and develop in vitro, however, in medium without added creatine, so they likely synthesize this important free-energy buffer as well. Arginine, glycine, and methionine are consumed during creatine synthesis, and while each of these precursors could be regenerated, their transport into blastocysts also likely supports creatine synthesis.

Blastocysts also probably convert arginine to proline for prolyl residue-rich extracellular matrix protein production, as is the case in vascular smooth muscle cells [52, 53]. The presence of amino acids including arginine in culture medium fosters more normal development of the extracellular matrix in blastocysts [54]. Little or no proline likely is taken up directly by blastocysts, however, because its  $K_m$  values for transport are higher [55, 56] than most competing amino acids that are present in vivo [57] and in vitro [54]. Moreover, some culture media used for blastocyst development contain sixfold more arginine than proline [e.g., 54], and blastocysts express at least five transporters that select arginine over other amino acids as a substrate (see above). For these reasons, we favor the hypothesis that arginine rather than proline is the precursor for synthesis of prolyl residue-rich extracellular matrix proteins in blastocysts.

Finally, arginine is a substrate for the production of both nitric oxide (NO) and polyamines, through the actions of nitric oxide synthase (NOS) and arginase [58, 59]. Both NO and polyamines have been shown to be important for blastocyst outgrowth in vitro [60–65]. As discussed below, there is substantial evidence suggesting that either or both of these compounds may be downstream of mTOR in regulating the onset of TE motility.

## LINKING UP AMINO ACIDS, mTOR, AND MOTILITY

The link between amino acid signaling and development of trophoblast motility is not yet clear. It may result from a change in translation of a specific mRNA or group of mRNAs, as mTOR activity strongly affects protein translation both through p70S6K activation and through PHAS-I inactivation. Phosphorylation by mTOR activates p70S6K and results in an increase in translation of a group of mRNAs known as 5'TOP mRNAs [reviewed in 66]. These messages have a characteristic polypyrimidine tract at their 5' ends and typically encode proteins that are important components of the translational machinery. In contrast, PHAS-I is inactivated by mTOR phosphorylation. When dephosphorylated, it forms a complex with eIF4E, which is the cap-binding protein in the eIF4F initiation complex. Phosphorylation of PHAS-I leads to dissociation of the complex and an increase in free eIF4E, which can then participate in forming active initiation complexes [reviewed in 67, 68].

The role of eIF4E in regulating cell behavior is of particular interest in the context of TE differentiation. This protein participates in Ras transformation of cells and overexpression of eIF4E in cultured cells leads to malignant transformation [69–71]. In addition, overexpression of eIF4E in *Xenopus* animal caps promotes mesoderm induction, indicating that it can play a role in cell differentiation during development [72]. The availability of eIF4E has

been found to be less important for general protein synthesis than for enhanced translation of specific messages [73, 74]. In particular, translation of mRNAs that have complex 5'-untranslated regions, which often code for proteins associated with growth control and differentiation, is preferentially increased several fold over the average [69, 70, 75, 76]. Based on these observations, we hypothesize that amino acid-stimulated mTOR activity in TE cells promotes translation of mRNA(s) encoding a protein (or proteins) important in regulating the onset of motility. The cellular events triggered by amino acid signaling are likely to be downstream either of p70S6K phosphorylation, PHAS-I phosphorylation, or both.

From this perspective, the mRNAs encoding insulin-like growth factor II (IGFII) and ornithine decarboxylase (ODC) are particularly interesting candidates. Translation of each is regulated by mTOR [73, 77]. IGFII is expressed specifically in TE and trophoblast cells at the time of implantation [78] and has been shown to induce nitric oxide production in myoblasts [79]. Ornithine decarboxylase is the rate-limiting enzyme in the synthesis of polyamines from ornithine (a product of arginase action on arginine), and polyamines are required for embryo outgrowth [65].

**Nitric oxide and trophoblast motility.** A role for NO in regulating trophoblast motility is supported by many observations. To begin with, TE motility and outgrowth are inhibited in medium lacking the NO precursor arginine (Arg) [14, 15, 17]. Arg is used to generate NO by the enzyme nitric oxide synthase (NOS) [58, 59]. NO can act in both a paracrine and an autocrine manner, and signals through activation of soluble guanylyl cyclase to produce cGMP. NO produced by the TE could be important in vivo to initiate TE motility as well as to promote maternal capillary dilation during implantation. Very interestingly, NO has been shown to promote cell motility in several different cell types through modification of cell-substrate adhesion. In endothelial cells and smooth muscle cells, NO inhibits focal adhesion and stress fiber formation by activating protein tyrosine phosphatase 1b (PTP-1b or SHP2) in a cyclic GMP-dependent fashion [80–85].

Several studies have shown that inhibitors of NOS arrest blastocyst development and trophoblast outgrowth in the mouse [64, 86, 87]. Consistent with these observations, in vivo administration of NO inhibitors into the uteri of rats significantly decreases the number of embryos that implant [62, 88]. In addition, hepatocyte growth factor-induced motility of human trophoblast cells is activated by NO signaling through PI3K and mTOR [89]. Blastocysts in delay of implantation express eNOS and iNOS within 1 h of the estrogen injection that triggers their reactivation and implantation [63]. The iNOS expression is highest in peri-implantation blastocysts relative to earlier or later stages of development [90].

**Polyamines and trophoblast motility.** Changes in motility may also be the result of an increase in ODC in TE cells, as increased eIF4E activity specifically enhances the translation of this mRNA [73]. ODC is the rate-limiting enzyme in polyamine synthesis from arginine [58]. Polyamines associate with DNA and nuclear proteins to produce normal chromatin and are thus required for new cells in the polar TE and for polyploid nuclei in the mural TE during giant cell formation. In addition to their well-known roles in chromatin organization, polyamine signaling has also been shown to affect intracellular signaling pathways such as those involving tyrosine and MAP kinases and the proto-oncogenes, c-myc, c-jun, and c-fos [91]. Many studies have

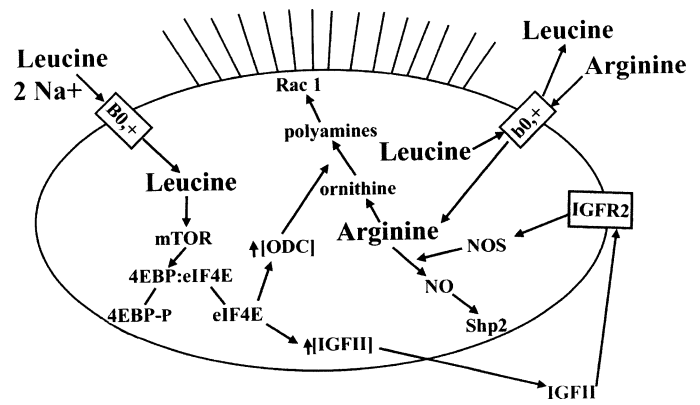

FIG. 3. A model for the potential actions of leucine and arginine in initiating motility in the trophoblast. Leucine uptake by  $B^{0,+}$  leads to concentration within the cell, where it can activate mammalian target of rapamycin (mTOR). In addition, it can act as a counter transporter for uptake of arginine. Phosphorylation of 4EBP by mTOR leads to increased levels of free eIF4E, which not only elevates protein translation generally, but specifically increases that of ornithine decarboxylase (ODC) and insulin-like growth factor II (IGFII). Increased internal arginine provides the substrate for arginase (to form ornithine) and nitric oxide synthase (NOS) (to form nitric oxide, NO). IGFII can act through its receptor to increase NOS activity, while increased levels of ODC lead to increased synthesis of polyamines. Polyamines can activate cell motility through Rac 1, while NO can affect cell motility through the phosphatase Shp-1 and its subsequent effects on adhesion complexes.

found a link between ODC activity, cellular transformation, and cell motility. Overexpression of ODC leads to higher motility and invasiveness, while depletion of polyamines results in arrested migration, changes in cytoskeletal organization, and a decrease in integrin signaling through FAK [92–97]. In the intestinal epithelial cell line, IEC-6, increased polyamine synthesis upon wounding leads in turn to greater  $K_v$  channel gene expression, membrane hyperpolarization, increased cytosolic  $[Ca^{2+}]$ , greater GTP-RhoA and Rac 1 activity, Rho-kinase activation, myosin phosphorylation, myosin/F-actin stress fiber formation, and cell migration [98, 99]. The effect of polyamines on cell motility depends ultimately on Rac 1 activation, providing the outline of one potential pathway from amino acids to motility [99].

Another way in which polyamines regulate IEC-6 cell motility is through modification of  $\beta$ -catenin phosphorylation [100]. The  $\beta$ -catenin phosphorylation not only leads to epithelial cell migration but also reduces cell-cell adhesion and fosters epithelial cell dissociation. This or a similar mechanism may function in the changes in cell-cell adhesion seen in blastocysts as they become competent to implant [2].

## SUMMARY AND FUTURE DIRECTIONS

Amino acids are critical not only as nutrients for the mammalian embryo but also as regulators of its ability to implant and continue development. The data suggest that this is a very sophisticated system that specifically regulates motility without affecting many other aspects of TE differentiation and effectively controls the ability of the embryo to initiate invasion. Amino acid signaling in the embryo is regulated through the uterine environment, most likely by  $B^{0,+}$  amino acid transporter activity. This mechanism provides one way for the uterus and the embryo to more precisely coordinate their progression to implantation; as the uterus becomes receptive, it in turn signals the embryo to progress to an invasive phenotype.

The exact mechanism by which the uterus regulates amino acid transport in the embryo is not known, but is quite likely part of the normal process of induction of uterine receptivity. In the case of experimental delay of implantation, administration of estrogen both initiates uterine activation and receptivity and the changes in amino acid uptake and motility in the blastocyst [34, 101]. Two potential regulatory factors are an increase in sodium concentration, which would stimulate the uptake of leucine by the  $B^{0,+}$  transporter [37, 38], or alternatively, an increase in chymotrypsin-like enzyme activity, which would activate the  $B^{0,+}$  transporter for uptake [30, 42–44]. We still need to learn how estrogen initiates changes in the concentration of sodium and chymotrypsin-like enzyme activity in uterine secretions. The latter activity may act on blastocysts to stimulate system  $B^{0,+}$  activity via a novel serine protease-activated receptor [30].

Downstream of amino acid transport, the pathway leading from amino acids to increased TE motility is emerging, and some of the components have now been identified. Leucine and arginine are clearly the key amino acids, and the dynamics of their transport in the blastocyst suggest that leucine may function to drive arginine transport. Arginine has many functions in cells, but its roles in NO and polyamine production are clearly of great interest in relation to regulation of motility. The activation of mTOR is required, and several downstream targets, such as IGFII and ODC, are candidates for effectors in regulating motility. The link between mTOR activation and the requirement for arginine needs, however, to be determined. It is possible that mTOR and arginine have parallel functions in regulating trophoblast motility or that both pathways act in concert (Fig. 3). Leucine may increase IGFII signaling and ODC activity through activation of mTOR as well as promoting uptake of arginine. IGFII may then both promote NO production from arginine to stimulate motility and induce growth and differentiation. The increase in ODC may promote an increase in polyamine production from arginine, which in turn both activates Rac 1 and other aspects of motility, as well as supporting the necessary chromatin requirements of proliferation and endoreduplication.

Interestingly, there are two mouse mutants that exhibit defects in implantation consistent with an effect on amino acid and/or mTOR signaling. The best characterized of these is the knockout of leukemia inhibitory factor (LIF), which results in a defect in uterine receptivity. Female mice that lack LIF are sterile because the uterus does not become receptive and the embryos do not implant [102]. Recent studies have shown that LIF expression in the uterus is induced by estrogen and that LIF itself can substitute for estrogen to induce decidualization and implantation [103]. These observations suggest that changes in sodium and/or chymotrypsin-like activity in the uterine fluid may be triggered either directly or indirectly by the action of LIF, and thus LIF-deficient mice may be an ideal model system in which to study this question.

The other mutant of interest is the knockout of the T-box transcription factor Tbr-2, or oomesodermin, which results in a defect in blastocyst activation. Embryos lacking Tbr-2 develop normally to the blastocyst stage but then remain as fully expanded blastocysts, unable either to form outgrowths in vitro or to implant into the uterus [104]. These observations suggest that some component(s) of the amino acid to mTOR signaling system may be a transcriptional target of Tbr-2. Alternatively, it is possible that Tbr-2 controls transcription of the genes encoding proteins

needed to initiate motility. This interpretation is supported by the fact that when Tbr-2-null embryos are rescued by aggregation with tetraploid wild-type embryos, the wild-type-derived trophoblast allows them to implant, but they fail at gastrulation due to lack of migration of the prospective mesoderm. Thus, lack of Tbr-2 has the same effect on both trophectoderm and mesoderm cell behavior. Further definition of the targets of Tbr-2 and of the targets of mTOR activation should shed light on this question.

While much remains to be learned, we have begun to draw a molecular and physiological link between the intertwined processes of uterine receptivity and embryo activation. Further investigation should provide important insights into the regulation of implantation.

## REFERENCES

1. Sutherland AE. Mechanisms of implantation in the mouse: differentiation and functional importance of trophoblast giant cell behavior. *Dev Biol* 2003; 258:241–251.
2. Martin PM, Sutherland AE. Exogenous amino acids regulate trophoblast differentiation through an mTOR-dependent pathway. *Dev Biol* 2001; 240:182–193.
3. Schultz JF, Armant DR. Beta 1- and beta 3-class integrins mediate fibronectin binding activity at the surface of developing mouse peri-implantation blastocysts. Regulation by ligand-induced mobilization of stored receptor. *J Biol Chem* 1995; 270:11522–11531.
4. Wang J, Mayernik L, Armant DR. Integrin signaling regulates blastocyst adhesion to fibronectin at implantation: intracellular calcium transients and vesicle trafficking in primary trophoblast cells. *Dev Biol* 2002; 245:270–279.
5. Schultz JF, Mayernik L, Rout UK, Armant DR. Integrin trafficking regulates adhesion to fibronectin during differentiation of mouse peri-implantation blastocysts. *Dev Genet* 1997; 21:31–43.
6. Sutherland AE, Calarco PG, Damsky CH. Expression and function of cell surface extracellular matrix receptors in mouse blastocyst attachment and outgrowth. *J Cell Biol* 1988; 106:1331–1348.
7. Olovsson M, Nilsson BO. Structural and functional properties of trophoblast cells of mouse egg-cylinders in vitro. *Anat Rec* 1993; 236:417–424.
8. Klaffky EJ, Williams RG, Yao CC, Ziober BL, Kramer RH, Sutherland AE. The expression and function of alpha 7 integrin in mouse embryo trophoblast differentiation. *Dev Biol* 2001; 239:161–175.
9. Welsh AO, Enders AC. Trophoblast-decidual cell interactions and establishment of maternal blood circulation in the parietal yolk sac placenta of the rat. *Anat Rec* 1987; 217:203–219.
10. Bevilacqua EMAR, Abrahamssohn PA. Ultrastructure of trophoblast giant cell transformation during the invasive stage of implantation of the mouse embryo. *J Morphol* 1988; 198:341–351.
11. Bevilacqua EM, Abrahamssohn PA. Trophoblast invasion during implantation of the mouse embryo. *Arch Biol Med Exp (Santiago)* 1989; 22:107–118.
12. Nose A, Takeichi M. A novel cadherin cell adhesion molecule: its expression patterns associated with implantation and organogenesis of mouse embryos. *J Cell Biol* 1986; 103:2649–2658.
13. Paria BC, Zhao X, Das SK, Dey SK, Yoshinaga K. Zonula occludens-1 and E-cadherin are coordinately expressed in the mouse uterus with the initiation of implantation and decidualization. *Dev Biol* 1999; 208:488–501.
14. Gwatkin RB. Amino acid requirements for attachment and outgrowth of the mouse blastocyst in vitro. *J Cell Physiol* 1966; 68:335–344.
15. Naeslund G. The effect of glucose-, arginine- and leucine-deprivation on mouse blastocyst outgrowth in vitro. *Ups J Med Sci* 1979; 84:9–20.
16. Blake EJ, Schindler J, Sherman MI. Protein synthetic requirements for the outgrowth of trophoblast cells from mouse blastocysts. *J Exp Zool* 1982; 224:401–408.
17. Gwatkin RB. Defined media and development of mammalian eggs in vitro. *Ann N Y Acad Sci* 1966; 139:79–90.
18. Kimball SR, Jefferson LS. Regulation of translation initiation in mammalian cells by amino acids. In: Sonenberg N, Hershey JWB, Mathews MB (eds.), *Translational Control of Gene Expression*. Cold Spring Harbor, NY: Cold Spring Harbor Laboratory Press; 2000: 561–579.
19. Patti ME, Brambilla E, Luzi L, Landaker EJ, Kahn CR. Bidirectional



- modulation of insulin action by amino acids. *J Clin Invest* 1998; 101:1519–1529.
20. Xu G, Kwon G, Marshall CA, Lin TA, Lawrence JC Jr, McDaniel ML. Branched-chain amino acids are essential in the regulation of PHAS-I and p70 S6 kinase by pancreatic beta-cells. A possible role in protein translation and mitogenic signaling. *J Biol Chem* 1998; 273:28178–28184.
  21. Proud CG. Regulation of mammalian translation factors by nutrients. *Eur J Biochem* 2002; 269:5338–5349.
  22. Fox HL, Kimball SR, Jefferson LS, Lynch CJ. Amino acids stimulate phosphorylation of p70S6k and organization of rat adipocytes into multicellular clusters. *Am J Physiol* 1998; 274:C206–213.
  23. Shigemitsu K, Tsujishita Y, Miyake H, Hidayat S, Tanaka N, Hara K, Yonezawa K. Structural requirement of leucine for activation of p70 S6 kinase. *FEBS Lett* 1999; 447:303–306.
  24. Van Winkle LJ, Dickinson HR. Differences in amino acid content of preimplantation mouse embryos that develop in vitro versus in vivo: in vitro effects of five amino acids that are abundant in oviductal secretions. *Biol Reprod* 1995; 52:96–104.
  25. Houghton FD, Hawhead JA, Humpherson PG, Hogg JE, Balen AH, Rutherford AJ, Leese HJ. Non-invasive amino acid turnover predicts human embryo developmental capacity. *Hum Reprod* 2002; 17:999–1005.
  26. Gwatkin RB. Nutritional requirements for post-blastocyst development in the mouse. Amino acids and protein in the uterus during implantation. *Int J Fertil* 1969; 14:101–105.
  27. Van Winkle LJ. Amino acid transporters (human). In: Creighton TE (ed.), *Encyclopedia of Molecular Medicine*. New York: John Wiley & Sons; 2001:172–176.
  28. Christensen HN. Role of amino acid transport and counter transport in nutrition and metabolism. *Physiol Rev* 1990; 70:43–77.
  29. Van Winkle LJ, Adjaye J, Campione AL. Amino acid transport-related proteins apparently expressed in preimplantation mouse blastocysts likely also are expressed in early human embryos. *Biol Reprod* 2001; 64:278.
  30. Van Winkle LJ. Amino acid transport regulation and early embryo development. *Biol Reprod* 2001; 64:1–12.
  31. Van Winkle LJ. *Biomembrane Transport*. San Diego: Academic Press; 1999.
  32. Weitlauf HM. Changes in the protein content of blastocysts from normal and delayed implanting mice. *Anat Rec* 1973; 176:121–123.
  33. Van Blerkom J, Chavez DJ, Bell H. Molecular and cellular aspects of facultative delayed implantation in the mouse. *Ciba Found Symp* 1978; 64:141–172.
  34. Yoshinaga K, Adams CE. Delayed implantation in the spayed, progesterone treated adult mouse. *J Reprod Fertil* 1966; 12:593–595.
  35. Mead RA. Embryonic diapause in vertebrates. *J Exp Zool* 1993; 266: 629–641.
  36. Renfree MB, Shaw G. Diapause. *Annu Rev Physiol* 2000; 62:353–375.
  37. Nilsson BO, Ljung L. X-ray microanalyses of cations (Na, K, Ca) and anions (S, P, and Cl) in uterine secretions during blastocyst implantation in the rat. *J Exp Zool* 1985; 234:415–421.
  38. Van Winkle LJ, Campione AL, Webster DP. Sodium ion concentrations in uterine flushings from “implanting” and “delayed implanting” mice. *J Exp Zool* 1983; 226:321–324.
  39. Sloan JL, Mager S. Cloning and functional expression of a human Na(+) and Cl(–)-dependent neutral and cationic amino acid transporter B(0+). *J Biol Chem* 1999; 274:23740–23745.
  40. Christie GR, Hajdich E, Hundal HS, Proud CG, Taylor PM. Intracellular sensing of amino acids in *Xenopus laevis* oocytes stimulates p70S6 kinase in a target of rapamycin-dependent manner. *J Biol Chem* 2002; 277:9952–9957.
  41. Van Winkle LJ. Activation of amino acid accumulation in delayed implantation mouse blastocysts. *J Exp Zool* 1981; 218:239–246.
  42. Hoversland RC, Weitlauf H. The effect of estrogen and progesterone on the level of amidase activity in fluid flushed from the uteri of ovariectomized mice. *Biol Reprod* 1978; 19:908–912.
  43. Van Winkle LJ. Genetic regulation of expression of intestinal biomembrane transport proteins in response to dietary protein, carbohydrate and lipid. In: Barrett KE, Donowitz M (eds.), *Gastrointestinal Transport*. San Diego: Academic Press; 2001:113–161.
  44. Van Winkle LJ. Chymotrypsin stimulated development of delayed implantation mouse blastocysts. *Biochem Biophys Res Commun* 1981; 98:562–568.
  45. Van Winkle LJ, Campione AL. Development of amino acid transport system B<sup>0+</sup> in mouse blastocysts. *Biochim Biophys Acta* 1987; 925: 164–174.
  46. Torrents D, Estévez R, Pineda M, Fernández E, Shi Y-B, Zorzano A, Palacin M. Identification and characterization of a membrane protein (y<sup>+</sup>L amino acid transporter-1) that associates with 4F2hc to encode the amino acid transport activity y<sup>+</sup>L. *J Biol Chem* 1998; 273:32437–32445.
  47. Hatanaka T, Huang W, Ling R, Prasad PD, Sugawara M, Leibach FH, Ganapathy V. Evidence for the transport of neutral as well as cationic amino acids by ATA3, a novel and liver-specific subtype of amino acid transport system A. *Biochim Biophys Acta* 2001; 1510: 10–17.
  48. Van Winkle LJ, Christensen HN, Campione AL. Na<sup>+</sup>-dependent transport of basic, zwitterionic, and bicyclic amino acids by a broad-scope system in mouse blastocysts. *J Biol Chem* 1985; 260:12118–12123.
  49. Iyengar MR, Iyengar CWL, Chen HT, Brinster RL, Bornslaeger ERMS. Expression of creatine kinase isoenzyme during oogenesis and embryogenesis in the mouse. *Dev Biol* 1983; 96:263–268.
  50. Mukherjee A, Dey SK, Gupta JS, Ramadoss CS, Dickmann Z. Regulatory enzymes of carbohydrate and energy metabolism in the rabbit blastocyst. *J Reprod Fertil* 1978; 53:77–80.
  51. Ohtsuki S, Tachikawa M, Takenaga H, Shimizu H, Watanabe M, Hosoya K, Terasaki T. The blood-brain barrier creatine transporter is a major pathway for supplying creatine to the brain. *J Cereb Blood Flow Metab* 2002; 22:1327–1335.
  52. Durante W, Liao L, Reyna SV, Peyton KJ, Schafer AI. Transforming growth factor- $\beta$ 1 stimulates L-arginine transport and metabolism in vascular smooth muscle cells. *Circulation* 2001; 103:1121–1127.
  53. Durante W, Liao L, Reyna SV, Payton KJ, Schafer AI. Physiological cyclic stretch directs L-arginine transport and metabolism to collagen synthesis in vascular smooth muscle. *FASEB J* 2000; 14:1775–1783.
  54. Biggers JD, McGinnis LK, Raffin M. Amino acids and preimplantation development of the mouse in protein-free potassium simplex optimized medium. *Biol Reprod* 2000; 63:281–293.
  55. Van Winkle LJ, Campione AL, Farrington BH. Development of system B<sup>0+</sup> and a broad-scope Na(+)–dependent transporter of zwitterionic amino acids in preimplantation mouse conceptuses. *Biochim Biophys Acta* 1990; 1025:225–233.
  56. Van Winkle LJ, Campione AL, Gorman JM. Na<sup>+</sup>–independent transport of basic and zwitterionic amino acids in mouse blastocysts by a shared system and by processes which distinguish between these substrates. *J Biol Chem* 1988; 263:3150–3163.
  57. Dumoulin JCM, Evers JLH, Bras MP, Geraedts JPM. Positive effect of taurine on preimplantation development of mouse embryos in vitro. *J Reprod Fertil* 1992; 94:373–380.
  58. Wu G, Morris SM Jr. Arginine metabolism: nitric oxide and beyond. *Biochem J* 1998; 336(pt 1):1–17.
  59. Dixit VD, Parvizi N. Nitric oxide and the control of reproduction. *Anim Reprod Sci* 2001; 65:1–16.
  60. Durán-Reyes G, Gómez-Meléndez MD, Morali-de la Brena G, Mercado-Pichardo E, Medina-Navarro R, Hicks-Gómez JJ. Nitric oxide synthesis inhibition suppresses implantation and decreases cGMP concentration and protein peroxidation. *Life Sci* 1999; 65:2259–2268.
  61. Chwalisz K, Winterhager E, Thienel T, Garfield RE. Synergistic role of nitric oxide and progesterone during the establishment of pregnancy in the rat. *Hum Reprod* 1999; 14:542–552.
  62. Biswas S, Kabir SN, Pal AK. The role of nitric oxide in the process of implantation in rats. *J Reprod Fertil* 1998; 114:157–161.
  63. Gouge RC, Marshburn P, Gordon BE, Nunley W, Huet-Hudson YM. Nitric oxide as a regulator of embryonic development. *Biol Reprod* 1998; 58:875–879.
  64. Sengoku K, Takuma N, Horikawa M, Tsuchiya K, Komori H, Sharifa D, Tamate K, Ishikawa M. Requirement of nitric oxide for murine oocyte maturation, embryo development, and trophoblast outgrowth in vitro. *Mol Reprod Dev* 2001; 58:262–268.
  65. Van Winkle LJ, Campione AL. Effect of inhibitors of polyamine synthesis on activation of diapausing mouse blastocysts in vitro. *J Reprod Fertil* 1983; 68:437–444.
  66. Meyuhas O, Hornstein E. Translational control of TOP mRNAs. In: Sonenberg N, Hershey JWB, Mathews MB (eds.), *Translational Control of Gene Expression*. Cold Spring Harbor, NY: Cold Spring Harbor Laboratory Press; 2000:671–693.
  67. Lawrence JC Jr, Abraham RT. PHAS/4E-BPs as regulators of mRNA translation and cell proliferation. *Trends Biochem Sci* 1997; 22:345–349.

68. Raught B, Gingras AC, Sonenberg N. Regulation of ribosomal recruitment in eukaryotes. In: Sonenberg N, Hershey JWB, Mathews MB (eds.), *Translational Control of Gene Expression*. Cold Spring Harbor, NY: Cold Spring Harbor Laboratory Press; 2000:245–293.
69. De Benedetti A, Rhoads RE. Overexpression of eukaryotic protein synthesis initiation factor 4E in HeLa cells results in aberrant growth and morphology. *Proc Natl Acad Sci U S A* 1990; 87:8212–8216.
70. Lazaris-Karatzas A, Montine KS, Sonenberg N. Malignant transformation by a eukaryotic initiation factor subunit that binds to mRNA 5' cap. *Nature* 1990; 345:544–547.
71. Lazaris-Karatzas A, Smith MR, Frederickson RM, Jaramillo ML, Liu YL, Kung HF, Sonenberg N. Ras mediates translation initiation factor 4E-induced malignant transformation. *Genes Dev* 1992; 6:1631–1642.
72. Klein PS, Melton DA. Induction of mesoderm in *Xenopus laevis* embryos by translation initiation factor 4E. *Science* 1994; 265:803–806.
73. Kimball SR, Shantz LM, Horetsky RL, Jefferson LS. Leucine regulates translation of specific mRNAs in L6 myoblasts through mTOR-mediated changes in availability of eIF4E and phosphorylation of ribosomal protein S6. *J Biol Chem* 1999; 274:11647–11652.
74. Kleijn M, Scheper GC, Voorma HO, Thomas AA. Regulation of translation initiation factors by signal transduction. *Eur J Biochem* 1998; 253:531–544.
75. Koromilas AE, Lazaris-Karatzas A, Sonenberg N. mRNAs containing extensive secondary structure in their 5' non-coding region translate efficiently in cells overexpressing initiation factor eIF-4E. *EMBO J* 1992; 11:4153–4158.
76. Kozak M. An analysis of 5'-noncoding sequences from 699 vertebrate messenger RNAs. *Nucleic Acids Res* 1987; 15:8125–8148.
77. Nielsen FC, Ostergaard L, Nielsen J, Christiansen J. Growth-dependent translation of IGF-II mRNA by a rapamycin-sensitive pathway. *Nature* 1995; 377:358–362.
78. Lee JE, Pintar J, Efstratiadis A. Pattern of the insulin-like growth factor II gene expression during early mouse embryogenesis. *Development* 1990; 110:151–159.
79. Kaliman P, Canicio J, Testar X, Palacin M, Zorzano A. Insuline-like growth factor-II, phosphatidylinositol 3-kinase, nuclear factor- $\kappa$ B and inducible nitric-oxide synthase define a common myogenic signaling pathway. *J Biol Chem* 1999; 274:17437–17444.
80. Chang Y, Ceacareanu B, Dixit M, Sreejayan N, Hassid A. Nitric oxide-induced motility in aortic smooth muscle cells: role of protein tyrosine phosphatase SHP-2 and GTP-binding protein Rho. *Circ Res* 2002; 91:390–397.
81. Sreejayan N, Lin Y, Hassid A. NO attenuates insulin signaling and motility in aortic smooth muscle cells via protein tyrosine phosphatase 1B-mediated mechanism. *Arterioscler Thromb Vasc Biol* 2002; 22:1086–1092.
82. Brown C, Lin Y, Hassid A. Requirement of protein tyrosine phosphatase SHP2 for NO-stimulated vascular smooth muscle cell motility. *Am J Physiol Heart Circ Physiol* 2001; 281:H1598–1605.
83. Hassid A, Yao J, Huang S. NO alters cell shape and motility in aortic smooth muscle cells via protein tyrosine phosphatase 1B activation. *Am J Physiol* 1999; 277:H1014–1026.
84. Brown C, Pan X, Hassid A. Nitric oxide and C-type atrial natriuretic peptide stimulate primary aortic smooth muscle cell migration via a cGMP-dependent mechanism: relationship to microfilament dissociation and altered cell morphology. *Circ Res* 1999; 84:655–667.
85. Kaur K, Yao J, Pan X, Matthews C, Hassid A. NO decreases phosphorylation of focal adhesion proteins via reduction of Ca in rat aortic smooth muscle cells. *Am J Physiol* 1998; 274:H1613–1619.
86. Chen HW, Jiang WS, Tzeng CR. Nitric oxide as a regulator in preimplantation embryo development and apoptosis. *Fertil Steril* 2001; 75:1163–1171.
87. Tranguch S, Steuerwald N, Huet-Hudson YM. Nitric oxide synthase production and nitric oxide regulation of preimplantation embryo development. *Biol Reprod* 2003; 68:1538–1544.
88. Novaro V, Gonzalez E, Jawerbaum A, Rettori V, Canteros G, Gimeno MF. Nitric oxide synthase regulation during embryonic implantation. *Reprod Fertil Dev* 1997; 9:557–564.
89. Cartwright JE, Tse WK, Whitley GS. Hepatocyte growth factor induced human trophoblast motility involves phosphatidylinositol-3-kinase, mitogen-activated protein kinase, and inducible nitric oxide synthase. *Exp Cell Res* 2002; 279:219–226.
90. Saxena D, Purohit SB, Kumar P, Laloraya M. Increased appearance of inducible nitric oxide synthase in the uterus and embryo at implantation. *Nitric Oxide. Biol Chem* 2000; 4:384–391.
91. Bachrach U, Wang Y-C, Tabib A. Polyamines: new cues in cellular signal transduction. *New Physiol Sci* 2001; 16:106–109.
92. Banan A, Wang JY, McCormack SA, Johnson LR. Relationship between polyamines, actin distribution, and gastric healing in rats. *Am J Physiol* 1996; 271:G893–903.
93. McCormack SA, Wang JY, Johnson LR. Polyamine deficiency causes reorganization of F-actin and tropomyosin in IEC-6 cells. *Am J Physiol* 1994; 267:C715–722.
94. McCormack SA, Ray RM, Blanner PM, Johnson LR. Polyamine depletion alters the relationship of F-actin, G-actin, and thymosin beta4 in migrating IEC-6 cells. *Am J Physiol* 1999; 276:C459–468.
95. Ray RM, Patel A, Viar MJ, McCormack SA, Zheng Y, Tigyi G, Johnson LR. RhoA inactivation inhibits cell migration but does not mediate the effects of polyamine depletion. *Gastroenterology* 2002; 123:196–205.
96. Wang JY, McCormack SA, Johnson LR. Role of nonmuscle myosin II in polyamine-dependent intestinal epithelial cell migration. *Am J Physiol* 1996; 270:G355–362.
97. Santos MF, Viar MJ, McCormack SA, Johnson LR. Polyamines are important for attachment of IEC-6 cells to extracellular matrix. *Am J Physiol* 1997; 273:G175–183.
98. Rao JN, Guo X, Liu L, Zou T, Murthy KS, Yuan JX, Wang JY. Polyamines regulate Rho-kinase and myosin phosphorylation during intestinal epithelial restitution. *Am J Physiol Cell Physiol* 2003; 284:C848–859.
99. Ray RM, McCormack SA, Covington C, Viar MJ, Zheng Y, Johnson LR. The requirement for polyamines for intestinal epithelial cell migration is mediated through Rac1. *J Biol Chem* 2003; 278:13039–13046.
100. Guo X, Rao JN, Liu L, Rizvi M, Turner DJ, Wang JY. Polyamines regulate beta-catenin tyrosine phosphorylation via Ca(2+) during intestinal epithelial cell migration. *Am J Physiol Cell Physiol* 2002; 283:C722–734.
101. Yoshinaga K. Uterine receptivity for blastocyst implantation. *Ann N Y Acad Sci* 1988; 541:424–431.
102. Stewart CL, Cullinan E. LIF and related cytokines in the regulation of mammalian development. *Ann N Y Acad Sci* 1995; 762:29–30.
103. Chen JR, Cheng JG, Shatzer T, Sewell L, Hernandez L, Stewart CL. Leukemia inhibitory factor can substitute for nidatory estrogen and is essential to inducing a receptive uterus for implantation but is not essential for subsequent embryogenesis. *Endocrinology* 2000; 141:4365–4372.
104. Russ AP, Wattler S, Colledge WH, Aparicio SA, Carlton MB, Pearce JJ, Barton SC, Surani MA, Ryan K, Nehls MC, Wilson V, Evans MJ. Eomesodermin is required for mouse trophoblast development and mesoderm formation. *Nature* 2000; 404:95–99.
105. Hwang S-Y, Oh B, Zhang Z, Miller W, Solter D, Knowles BB. The mouse *cornichon* gene family. *Dev Genes Evol* 1999; 209:120–125.
106. Van Winkle LJ, Patel M, Wasserlauf HG, Dickinson HR, Campione AL. Osmotic regulation of taurine transport via system  $\beta$  and novel processes in mouse preimplantation conceptuses. *Biochim Biophys Acta* 1994; 1191:244–255.
